# Supplementary material for: The Seroprevalence of SARS-CoV-2 Antibodies among HealthCare Workers in University Hospital in Krakow before the Era of Vaccination
Source: MDPI journal article supplement (doi:10.3390/ijerph19074044), 2022-03-29
Supplement: s1 [file s1]

## Supplementary: Questionnaires and guidance

### Form 1: Case and control initial reporting form (Day 1)

*Automatically generated by Go.Data or entered by interviewer*

| 1. Administration                                                        |                                                                                                 |
|--------------------------------------------------------------------------|-------------------------------------------------------------------------------------------------|
| Unique health worker ID                                                  |                                                                                                 |
| Case/control status <sup>1</sup>                                         | <input type="checkbox"/> Case <input type="checkbox"/> Control                                  |
| Name of health care facility                                             |                                                                                                 |
| Form completion date (dd/mm/yyyy)                                        | ___/___/___                                                                                     |
| Was the interviewer blind to the case/control status of the interviewee? | <input type="checkbox"/> Yes<br><input type="checkbox"/> No<br><input type="checkbox"/> Unknown |

**Instruction 1:** *personal information will be kept confidential by the local investigators according to their procedure. No personal information will be sent or shared in any way with WHO. No personal information will be published. When we publish the results of this study, your confidential personal information will not be shown.*

| 2. Identifier and basic information                            |                                                                                                                                                                                                                                                                                                                                                                                                                                                                                                                                                                                                                                                             |
|----------------------------------------------------------------|-------------------------------------------------------------------------------------------------------------------------------------------------------------------------------------------------------------------------------------------------------------------------------------------------------------------------------------------------------------------------------------------------------------------------------------------------------------------------------------------------------------------------------------------------------------------------------------------------------------------------------------------------------------|
| First name <sup>2</sup>                                        |                                                                                                                                                                                                                                                                                                                                                                                                                                                                                                                                                                                                                                                             |
| Surname <sup>2</sup>                                           |                                                                                                                                                                                                                                                                                                                                                                                                                                                                                                                                                                                                                                                             |
| Sex                                                            | <input type="checkbox"/> Male <input type="checkbox"/> Female <input type="checkbox"/> Not known                                                                                                                                                                                                                                                                                                                                                                                                                                                                                                                                                            |
| Date of birth (dd/mm/yyyy) <sup>2</sup>                        | ___/___/___                                                                                                                                                                                                                                                                                                                                                                                                                                                                                                                                                                                                                                                 |
| Telephone (mobile) number <sup>2</sup>                         |                                                                                                                                                                                                                                                                                                                                                                                                                                                                                                                                                                                                                                                             |
| Age (years, months)                                            |                                                                                                                                                                                                                                                                                                                                                                                                                                                                                                                                                                                                                                                             |
| Email address <sup>2</sup>                                     |                                                                                                                                                                                                                                                                                                                                                                                                                                                                                                                                                                                                                                                             |
| National social number/identifier (if applicable) <sup>2</sup> |                                                                                                                                                                                                                                                                                                                                                                                                                                                                                                                                                                                                                                                             |
| Country of residence                                           |                                                                                                                                                                                                                                                                                                                                                                                                                                                                                                                                                                                                                                                             |
| Nationality                                                    |                                                                                                                                                                                                                                                                                                                                                                                                                                                                                                                                                                                                                                                             |
| Occupation in health care facility                             | <input type="checkbox"/> Medical doctor<br><input type="checkbox"/> Registered nurse (or equivalent)<br><input type="checkbox"/> Assistant nurse, nurse technician (or equivalent)<br><input type="checkbox"/> Radiology/x-ray technician<br><input type="checkbox"/> Phlebotomist<br><input type="checkbox"/> Physical therapist<br><input type="checkbox"/> Nutritionist/dietician<br><b>Other health provider:</b><br><input type="checkbox"/> Laboratory personnel<br><input type="checkbox"/> Admission/reception clerk<br><input type="checkbox"/> Patient transporter<br><input type="checkbox"/> Catering staff<br><input type="checkbox"/> Cleaner |

<sup>1</sup> To be filled in by the lead investigator after the interview to ensure that the interviewer is blind to the case/control status of the interviewee.

<sup>2</sup> All of these variables will be anonymized.

|                   |                                                                                                                                                                                                          |
|-------------------|----------------------------------------------------------------------------------------------------------------------------------------------------------------------------------------------------------|
|                   | <input type="checkbox"/> Administration/clerk<br><input type="checkbox"/> Other [ <i>specify</i> ]:                                                                                                      |
| Educational level | <input type="checkbox"/> None<br><input type="checkbox"/> Primary<br><input type="checkbox"/> Secondary<br><input type="checkbox"/> Tertiary/University<br><input type="checkbox"/> Prefer not to answer |

**Instruction 2:** The information collected below will not be linked to your confidential personal information. Please answer the questions below honestly. Your data will help us to understand the potential risk factors for SARS-CoV-2 infection among health workers and to prevent future infections of health workers.

| 3. Context                                                                                                                                             |                                                                                                                                                                                                                                                                                                                                                                                                                                                                                   |
|--------------------------------------------------------------------------------------------------------------------------------------------------------|-----------------------------------------------------------------------------------------------------------------------------------------------------------------------------------------------------------------------------------------------------------------------------------------------------------------------------------------------------------------------------------------------------------------------------------------------------------------------------------|
| Are you a health worker specifically dedicated to caring for COVID-19 patients?                                                                        | <input type="checkbox"/> Yes<br><br>If yes, please specify the number of days dedicated to COVID-19 patients only during previous 14 days: _____<br><br><input type="checkbox"/> No<br><input type="checkbox"/> There are no COVID-19 dedicated staff in my facility                                                                                                                                                                                                              |
| Did you receive specific training in the care of COVID-19 patients?                                                                                    | <input type="checkbox"/> Yes<br><input type="checkbox"/> No<br><input type="checkbox"/> Not sure                                                                                                                                                                                                                                                                                                                                                                                  |
| In the past 14 days, outside of your occupational duties have you been in contact with a person or persons known to have been diagnosed with Covid-19? | <input type="checkbox"/> Yes<br><br>If yes, was this<br><input type="checkbox"/> household<br><input type="checkbox"/> professional colleagues<br><input type="checkbox"/> Most days ( $\geq 8$ days)<br><input type="checkbox"/> Some days (4–7 days)<br><input type="checkbox"/> Few days ( $\leq 3$ days)<br><br><input type="checkbox"/> everyday social interactions (e.g. public transport, market)<br><br><input type="checkbox"/> No<br><input type="checkbox"/> Not sure |
| In the past 14 days, how often have you used public transport?                                                                                         | <input type="checkbox"/> Most days ( $\geq 8$ days)<br><input type="checkbox"/> Some days (4–7 days)<br><input type="checkbox"/> Few days ( $\leq 3$ days)<br><input type="checkbox"/> Not used public transport                                                                                                                                                                                                                                                                  |
| In the past 14 days, how often have you had social interaction with individuals outside of work, home or transport (e.g. in markets, shops etc.)       | <input type="checkbox"/> Most days ( $\geq 8$ days)<br><input type="checkbox"/> Some days (4–7 days)<br><input type="checkbox"/> Few days ( $\leq 3$ days)<br><input type="checkbox"/> Not had any other social interaction                                                                                                                                                                                                                                                       |

| 4. Adherence to infection prevention and control (IPC) measures                                                                                                                                             |                                                                                                                                                                                                            |
|-------------------------------------------------------------------------------------------------------------------------------------------------------------------------------------------------------------|------------------------------------------------------------------------------------------------------------------------------------------------------------------------------------------------------------|
| What was the date of your most recent IPC training within the health care facility (dd/mm/yyyy)?                                                                                                            | ____/____/____<br><input type="checkbox"/> Forgotten/not sure<br><input type="checkbox"/> I don't know what IPC standard precautions are                                                                   |
| How much cumulative IPC training (standard precautions, additional precautions) have you received at this health care facility?                                                                             | <input type="checkbox"/> Less than 2 hours<br><input type="checkbox"/> More than 2 hours<br><input type="checkbox"/> I don't know what IPC standard precautions are                                        |
| Was the IPC training on personal protective equipment (PPE) carried out remotely (e.g. presentations only, e-learning) or were practical sessions on standard precautions/additional precautions conducted? | <input type="checkbox"/> Only remotely/theoretical<br><input type="checkbox"/> Only practical<br><input type="checkbox"/> Both<br><input type="checkbox"/> I don't know what IPC standard precautions are  |
| Do you know the recommended moments for hand hygiene in health care?                                                                                                                                        | <input type="checkbox"/> I don't know them<br><input type="checkbox"/> Yes, all 3<br><input type="checkbox"/> Yes, all 4<br><input type="checkbox"/> Yes, all 5<br><input type="checkbox"/> Yes, all 6     |
| Do you follow recommended hand hygiene practices?                                                                                                                                                           | <input type="checkbox"/> Always, as recommended<br><input type="checkbox"/> Most of the time<br><input type="checkbox"/> Occasionally<br><input type="checkbox"/> Rarely<br><input type="checkbox"/> Never |
| Do you use alcohol-based hand rub or soap and water before touching a patient?                                                                                                                              | <input type="checkbox"/> Always, as recommended<br><input type="checkbox"/> Most of the time<br><input type="checkbox"/> Occasionally<br><input type="checkbox"/> Rarely<br><input type="checkbox"/> Never |
| Do you use alcohol-based hand rub or soap and water before cleaning/aseptic procedures?                                                                                                                     | <input type="checkbox"/> Always, as recommended<br><input type="checkbox"/> Most of the time<br><input type="checkbox"/> Occasionally<br><input type="checkbox"/> Rarely<br><input type="checkbox"/> Never |
| Do you use alcohol-based hand rub or soap and water after (risk of) body fluid exposure?                                                                                                                    | <input type="checkbox"/> Always, as recommended<br><input type="checkbox"/> Most of the time<br><input type="checkbox"/> Occasionally<br><input type="checkbox"/> Rarely<br><input type="checkbox"/> Never |
| Do you use alcohol-based hand rub or soap and water after touching a patient?                                                                                                                               | <input type="checkbox"/> Always, as recommended<br><input type="checkbox"/> Most of the time<br><input type="checkbox"/> Occasionally<br><input type="checkbox"/> Rarely<br><input type="checkbox"/> Never |
| Do you use alcohol-based hand rub or soap and water after touching a patient's surroundings?                                                                                                                | <input type="checkbox"/> Always, as recommended<br><input type="checkbox"/> Most of the time<br><input type="checkbox"/> Occasionally<br><input type="checkbox"/> Rarely                                   |
| Is alcohol-based hand rub available at point of care                                                                                                                                                        | <input type="checkbox"/> Yes<br><input type="checkbox"/> No<br><input type="checkbox"/> Occasionally<br><input type="checkbox"/> Not sure                                                                  |

|                                                                                                                                                                                                     |                                                                                                                                                                                                                                                                                                                                                                                                     |
|-----------------------------------------------------------------------------------------------------------------------------------------------------------------------------------------------------|-----------------------------------------------------------------------------------------------------------------------------------------------------------------------------------------------------------------------------------------------------------------------------------------------------------------------------------------------------------------------------------------------------|
| Do you follow IPC standard precautions when in contact with any patient?                                                                                                                            | <input type="checkbox"/> Always, as recommended<br><input type="checkbox"/> Most of the time<br><input type="checkbox"/> Occasionally<br><input type="checkbox"/> Rarely<br><input type="checkbox"/> Never<br><input type="checkbox"/> I don't know what IPC standard precautions are                                                                                                               |
| Do you wear PPE when indicated?<br><br>(PPE includes: medical/surgical mask, face shield, gloves, goggles/glasses, gown, coverall, head cover, respirator (e.g. N95 or equivalent) and shoe covers) | <input type="checkbox"/> Always, according to the risk assessment<br><input type="checkbox"/> Most of the time, according to the risk assessment<br><input type="checkbox"/> Occasionally<br><input type="checkbox"/> Rarely<br><input type="checkbox"/> Never                                                                                                                                      |
| Is PPE available in sufficient quantity in the health care facility?                                                                                                                                | <input type="checkbox"/> Yes <input type="checkbox"/> No <input type="checkbox"/> Unknown                                                                                                                                                                                                                                                                                                           |
| If no, which PPE is missing?                                                                                                                                                                        | <input type="checkbox"/> Medical/surgical masks<br><input type="checkbox"/> Face shield or goggles/glasses<br><input type="checkbox"/> Gloves<br><input type="checkbox"/> Gown and coverall<br><input type="checkbox"/> Head cover<br><input type="checkbox"/> Respirator (e.g. N95, FFP2 or equivalent) used when exposed to aerosol-generating procedures<br><input type="checkbox"/> Shoe covers |

| 5. Exposures to COVID-19 infected patient(s)                                                                                                                                       |                                                                                                                                                                                                                         |
|------------------------------------------------------------------------------------------------------------------------------------------------------------------------------------|-------------------------------------------------------------------------------------------------------------------------------------------------------------------------------------------------------------------------|
| Date of admission of COVID-19 confirmed patient (dd/mm/yyyy)<br><br>(If you were exposed to more than one COVID-19 patient, please provide the earliest admission date among them) | ____/____/____<br><br><input type="checkbox"/> Unknown                                                                                                                                                                  |
| How many COVID-19 patients have you been exposed to during your occupational duties?                                                                                               | _____ (a range is also permissible)                                                                                                                                                                                     |
| Have you had close contact (within 1 metre) with the patient(s) since their admission?                                                                                             | <input type="checkbox"/> Yes <input type="checkbox"/> No <input type="checkbox"/> Unknown                                                                                                                               |
| <ul style="list-style-type: none"> <li>If yes, how many times (total)?</li> </ul>                                                                                                  | <input type="checkbox"/> < 10 times<br><input type="checkbox"/> 10–50 times<br><input type="checkbox"/> > 50 times<br><br>Please specify exactly how many times (if you can recall, optional): _____                    |
| <ul style="list-style-type: none"> <li>If yes, what was the maximum amount of time you spent with a COVID-19 patient?</li> </ul>                                                   | <input type="checkbox"/> < 5 minutes<br><input type="checkbox"/> 5–15 minutes<br><input type="checkbox"/> > 15 minutes                                                                                                  |
| <ul style="list-style-type: none"> <li>If yes, did you have prolonged face-to-face exposure (&gt; 15 minutes)?</li> </ul>                                                          | <input type="checkbox"/> Yes <input type="checkbox"/> No <input type="checkbox"/> Unknown<br><br>If yes, did you wear PPE?<br><input type="checkbox"/> Yes <input type="checkbox"/> No <input type="checkbox"/> Unknown |

|                                                                                                                                      |                                                                                                                                                                                                                                                                                                                                                                                                                                                                                           |
|--------------------------------------------------------------------------------------------------------------------------------------|-------------------------------------------------------------------------------------------------------------------------------------------------------------------------------------------------------------------------------------------------------------------------------------------------------------------------------------------------------------------------------------------------------------------------------------------------------------------------------------------|
|                                                                                                                                      | <p>If yes, what type?<br/>         Tick all that apply:<br/> <input type="checkbox"/> Medical/surgical mask<br/> <input type="checkbox"/> Face shield<br/> <input type="checkbox"/> Gloves<br/> <input type="checkbox"/> Goggles/glasses<br/> <input type="checkbox"/> Gown<br/> <input type="checkbox"/> Coverall<br/> <input type="checkbox"/> Head cover<br/> <input type="checkbox"/> Respirator (e.g. N95, FFP2 or equivalent)<br/> <input type="checkbox"/> Shoe covers</p>         |
| - If you were wearing a medical/surgical mask, what type?                                                                            |                                                                                                                                                                                                                                                                                                                                                                                                                                                                                           |
| - If you were wearing a respirator, was it test fitted?                                                                              | <input type="checkbox"/> Yes <input type="checkbox"/> No <input type="checkbox"/> Unknown                                                                                                                                                                                                                                                                                                                                                                                                 |
| - If you were wearing gloves, did you remove them after contact with the patient?                                                    | <input type="checkbox"/> Yes <input type="checkbox"/> No <input type="checkbox"/> Unknown                                                                                                                                                                                                                                                                                                                                                                                                 |
| <ul style="list-style-type: none"> <li>If yes, did you perform hand hygiene before contact with the patient?</li> </ul>              | <input type="checkbox"/> Always, as recommended<br><input type="checkbox"/> Most of the time<br><input type="checkbox"/> Occasionally<br><input type="checkbox"/> Rarely<br><input type="checkbox"/> Never<br><br>If yes:<br><input type="checkbox"/> Alcohol-based hand rub<br><input type="checkbox"/> Soap and water<br><input type="checkbox"/> Water                                                                                                                                 |
| <ul style="list-style-type: none"> <li>If yes, did you perform hand hygiene after contact with the patient?</li> </ul>               | <input type="checkbox"/> Always, as recommended<br><input type="checkbox"/> Most of the time<br><input type="checkbox"/> Occasionally<br><input type="checkbox"/> Rarely<br><input type="checkbox"/> Never<br><br>If yes:<br><input type="checkbox"/> Alcohol-based hand rub<br><input type="checkbox"/> Soap and water<br><input type="checkbox"/> Water                                                                                                                                 |
| <ul style="list-style-type: none"> <li>If yes, were you present for any aerosolizing procedures performed on the patient?</li> </ul> | <input type="checkbox"/> Yes <input type="checkbox"/> No <input type="checkbox"/> Unknown<br><br>If yes, describe the procedure:<br><br>If yes, did you wear PPE?<br><input type="checkbox"/> Yes <input type="checkbox"/> No <input type="checkbox"/> Unknown<br><br>If yes, what type?<br>Tick all that apply:<br><input type="checkbox"/> Medical/surgical mask<br><input type="checkbox"/> Face shield<br><input type="checkbox"/> Gloves<br><input type="checkbox"/> Goggles/glasses |

|                                                                                                                                                                                                                        |                                                                                                                                                                                                                                                                                                                                                                                                                                                                                                                                                                                                                                                                                                                           |
|------------------------------------------------------------------------------------------------------------------------------------------------------------------------------------------------------------------------|---------------------------------------------------------------------------------------------------------------------------------------------------------------------------------------------------------------------------------------------------------------------------------------------------------------------------------------------------------------------------------------------------------------------------------------------------------------------------------------------------------------------------------------------------------------------------------------------------------------------------------------------------------------------------------------------------------------------------|
|                                                                                                                                                                                                                        | <input type="checkbox"/> Gown<br><input type="checkbox"/> Coverall<br><input type="checkbox"/> Head cover<br><input type="checkbox"/> Respirator (e.g. N95, FFP2 or equivalent)<br><input type="checkbox"/> Shoe covers                                                                                                                                                                                                                                                                                                                                                                                                                                                                                                   |
| <ul style="list-style-type: none"> <li>If yes, did you come into contact with the patient's body fluids?</li> </ul>                                                                                                    | <input type="checkbox"/> Yes <input type="checkbox"/> No <input type="checkbox"/> Unknown<br><br>If yes, which body fluids: _____<br><br>If yes, were you wearing PPE?<br><input type="checkbox"/> Yes <input type="checkbox"/> No <input type="checkbox"/> Unknown<br><br>If yes, what type?<br>Tick all that apply:<br><input type="checkbox"/> Medical/surgical mask<br><input type="checkbox"/> Face shield<br><input type="checkbox"/> Gloves<br><input type="checkbox"/> Goggles/glasses<br><input type="checkbox"/> Gown<br><input type="checkbox"/> Coverall<br><input type="checkbox"/> Head cover<br><input type="checkbox"/> Respirator (e.g. N95, FFP2 or equivalent)<br><input type="checkbox"/> Shoe covers |
| Have you had direct contact with the patient's materials since their admission?<br><br>(Patient's materials include personal belongings, linen and medical equipment that the patient may have come into contact with) | <input type="checkbox"/> Yes <input type="checkbox"/> No <input type="checkbox"/> Unknown                                                                                                                                                                                                                                                                                                                                                                                                                                                                                                                                                                                                                                 |
| <ul style="list-style-type: none"> <li>If yes, which materials?</li> </ul>                                                                                                                                             | Tick all that apply:<br><input type="checkbox"/> Clothes<br><input type="checkbox"/> Personal items<br><input type="checkbox"/> Linen<br><input type="checkbox"/> Medical devices used on the patient<br><input type="checkbox"/> Medical equipment connected to the patient (e.g. ventilator, infusion pump etc.)<br><input type="checkbox"/> Other: _____                                                                                                                                                                                                                                                                                                                                                               |
| <ul style="list-style-type: none"> <li>If yes, how many times since their admission (total)?</li> </ul>                                                                                                                | <input type="checkbox"/> < 10 times<br><input type="checkbox"/> 10–50 times<br><input type="checkbox"/> > 50 times<br><br>Please specify exactly how many times (if you can recall, optional): _____                                                                                                                                                                                                                                                                                                                                                                                                                                                                                                                      |
| <ul style="list-style-type: none"> <li>If yes, did you come into contact with the patient's body fluids via the patient's materials?</li> </ul>                                                                        | <input type="checkbox"/> Yes <input type="checkbox"/> No <input type="checkbox"/> Unknown<br><br>If yes, which body fluids: _____<br>If yes, were you wearing PPE?                                                                                                                                                                                                                                                                                                                                                                                                                                                                                                                                                        |

|                                                                                                                                                 |                                                                                                                                                                                                                                                                                                                                                                                                                                                                                                                                                 |
|-------------------------------------------------------------------------------------------------------------------------------------------------|-------------------------------------------------------------------------------------------------------------------------------------------------------------------------------------------------------------------------------------------------------------------------------------------------------------------------------------------------------------------------------------------------------------------------------------------------------------------------------------------------------------------------------------------------|
|                                                                                                                                                 | <input type="checkbox"/> Yes <input type="checkbox"/> No <input type="checkbox"/> Unknown<br><br>If yes, what type?<br>Tick all that apply:<br><input type="checkbox"/> Medical/surgical mask<br><input type="checkbox"/> Face shield<br><input type="checkbox"/> Gloves<br><input type="checkbox"/> Goggles/glasses<br><input type="checkbox"/> Gown<br><input type="checkbox"/> Coverall<br><input type="checkbox"/> Head cover<br><input type="checkbox"/> Respirator (e.g. N95, FFP2 or equivalent)<br><input type="checkbox"/> Shoe covers |
| <ul style="list-style-type: none"> <li>If yes, did you perform hand hygiene before coming into contact with the patient's materials?</li> </ul> | <input type="checkbox"/> Always, as recommended<br><input type="checkbox"/> Most of the time<br><input type="checkbox"/> Occasionally<br><input type="checkbox"/> Rarely<br><input type="checkbox"/> Never<br><br>If yes:<br><input type="checkbox"/> Alcohol-based hand rub<br><input type="checkbox"/> Soap and water<br><input type="checkbox"/> Water                                                                                                                                                                                       |
| <ul style="list-style-type: none"> <li>If you were wearing gloves, did you remove them after contact with the patient?</li> </ul>               | <input type="checkbox"/> Yes <input type="checkbox"/> No <input type="checkbox"/> Unknown                                                                                                                                                                                                                                                                                                                                                                                                                                                       |
| <ul style="list-style-type: none"> <li>If yes, did you perform hand hygiene after contact with the patient's materials?</li> </ul>              | <input type="checkbox"/> Always, as recommended<br><input type="checkbox"/> Most of the time<br><input type="checkbox"/> Occasionally<br><input type="checkbox"/> Rarely<br><input type="checkbox"/> Never<br><br>If yes:<br><input type="checkbox"/> Alcohol-based hand rub<br><input type="checkbox"/> Soap and water<br><input type="checkbox"/> Water                                                                                                                                                                                       |
| Have you had direct contact with the surfaces around the patient?                                                                               | <input type="checkbox"/> Yes <input type="checkbox"/> No <input type="checkbox"/> Unknown                                                                                                                                                                                                                                                                                                                                                                                                                                                       |
| <ul style="list-style-type: none"> <li>If yes, which surfaces?</li> </ul>                                                                       | Tick all that apply:<br><input type="checkbox"/> Bed<br><input type="checkbox"/> Bathroom<br><input type="checkbox"/> Ward corridor<br><input type="checkbox"/> Patient table<br><input type="checkbox"/> Bedside table<br><input type="checkbox"/> Dining table<br><input type="checkbox"/> Medical gas panel<br><input type="checkbox"/> Other: _____                                                                                                                                                                                         |
| <ul style="list-style-type: none"> <li>How many times since their admission (total)?</li> </ul>                                                 | <input type="checkbox"/> < 10 times<br><input type="checkbox"/> 10–50 times<br><input type="checkbox"/> > 50 times<br>Please specify exactly how many times (if                                                                                                                                                                                                                                                                                                                                                                                 |

|                                                                                                                                                         |                                                                                                                                                                                                                                                                                                                                                                                                                                                                                                                                                                                                                                                                                                                           |
|---------------------------------------------------------------------------------------------------------------------------------------------------------|---------------------------------------------------------------------------------------------------------------------------------------------------------------------------------------------------------------------------------------------------------------------------------------------------------------------------------------------------------------------------------------------------------------------------------------------------------------------------------------------------------------------------------------------------------------------------------------------------------------------------------------------------------------------------------------------------------------------------|
|                                                                                                                                                         | you can recall, optional): _____                                                                                                                                                                                                                                                                                                                                                                                                                                                                                                                                                                                                                                                                                          |
| <ul style="list-style-type: none"> <li>If yes, did you come into contact with the patient's body fluids via the surfaces around the patient?</li> </ul> | <input type="checkbox"/> Yes <input type="checkbox"/> No <input type="checkbox"/> Unknown<br><br>If yes, which body fluids: _____<br><br>If yes, were you wearing PPE?<br><input type="checkbox"/> Yes <input type="checkbox"/> No <input type="checkbox"/> Unknown<br><br>If yes, what type?<br>Tick all that apply:<br><input type="checkbox"/> Medical/surgical mask<br><input type="checkbox"/> Face shield<br><input type="checkbox"/> Gloves<br><input type="checkbox"/> Goggles/glasses<br><input type="checkbox"/> Gown<br><input type="checkbox"/> Coverall<br><input type="checkbox"/> Head cover<br><input type="checkbox"/> Respirator (e.g. N95, FFP2 or equivalent)<br><input type="checkbox"/> Shoe covers |
| <ul style="list-style-type: none"> <li>If yes, did you perform hand hygiene after contact with these surfaces?</li> </ul>                               | <input type="checkbox"/> Always, as recommended<br><input type="checkbox"/> Most of the time<br><input type="checkbox"/> Occasionally<br><input type="checkbox"/> Rarely<br><input type="checkbox"/> Never<br><br>If yes:<br><input type="checkbox"/> Alcohol-based hand rub<br><input type="checkbox"/> Soap and water<br><input type="checkbox"/> Water                                                                                                                                                                                                                                                                                                                                                                 |

| 6a. Health worker symptoms                              |                                                                                                                                         |
|---------------------------------------------------------|-----------------------------------------------------------------------------------------------------------------------------------------|
| Date of first symptom onset (dd/mm/yyyy)                | ____/____/____<br><input type="checkbox"/> Forgotten/not sure                                                                           |
| Fever ( $\geq 38^{\circ}\text{C}$ ) or history of fever | <input type="checkbox"/> Yes <input type="checkbox"/> No <input type="checkbox"/> Unknown<br>If yes, specify maximum temperature: _____ |
| <b>Respiratory symptoms:</b>                            |                                                                                                                                         |
| Sore throat                                             | <input type="checkbox"/> Yes <input type="checkbox"/> No <input type="checkbox"/> Unknown                                               |
| Cough                                                   | <input type="checkbox"/> Yes <input type="checkbox"/> No <input type="checkbox"/> Unknown                                               |
| Runny nose                                              | <input type="checkbox"/> Yes <input type="checkbox"/> No <input type="checkbox"/> Unknown                                               |
| Shortness of breath                                     | <input type="checkbox"/> Yes <input type="checkbox"/> No <input type="checkbox"/> Unknown                                               |
| <b>Other symptoms:</b>                                  |                                                                                                                                         |
| Chills                                                  | <input type="checkbox"/> Yes <input type="checkbox"/> No <input type="checkbox"/> Unknown                                               |
| Vomiting                                                | <input type="checkbox"/> Yes <input type="checkbox"/> No <input type="checkbox"/> Unknown                                               |
| Nausea                                                  | <input type="checkbox"/> Yes <input type="checkbox"/> No <input type="checkbox"/> Unknown                                               |
| Diarrhoea                                               | <input type="checkbox"/> Yes <input type="checkbox"/> No <input type="checkbox"/> Unknown                                               |
| Headache                                                | <input type="checkbox"/> Yes <input type="checkbox"/> No <input type="checkbox"/> Unknown                                               |
| Rash                                                    | <input type="checkbox"/> Yes <input type="checkbox"/> No <input type="checkbox"/> Unknown                                               |
| Conjunctivitis                                          | <input type="checkbox"/> Yes <input type="checkbox"/> No <input type="checkbox"/> Unknown                                               |
| Muscle ache                                             | <input type="checkbox"/> Yes <input type="checkbox"/> No <input type="checkbox"/> Unknown                                               |



|                                  |                                                                                                                     |
|----------------------------------|---------------------------------------------------------------------------------------------------------------------|
| Joint ache                       | <input type="checkbox"/> Yes <input type="checkbox"/> No <input type="checkbox"/> Unknown                           |
| Loss of appetite                 | <input type="checkbox"/> Yes <input type="checkbox"/> No <input type="checkbox"/> Unknown                           |
| Loss of smell (anosmia) or taste | <input type="checkbox"/> Yes <input type="checkbox"/> No <input type="checkbox"/> Unknown                           |
| Nosebleed                        | <input type="checkbox"/> Yes <input type="checkbox"/> No <input type="checkbox"/> Unknown                           |
| Fatigue                          | <input type="checkbox"/> Yes <input type="checkbox"/> No <input type="checkbox"/> Unknown                           |
| Seizures                         | <input type="checkbox"/> Yes <input type="checkbox"/> No <input type="checkbox"/> Unknown                           |
| Altered consciousness            | <input type="checkbox"/> Yes <input type="checkbox"/> No <input type="checkbox"/> Unknown                           |
| Other neurological signs         | <input type="checkbox"/> Yes <input type="checkbox"/> No <input type="checkbox"/> Unknown<br>If yes, specify: _____ |
| Other symptoms                   | <input type="checkbox"/> Yes <input type="checkbox"/> No <input type="checkbox"/> Unknown<br>If yes, specify: _____ |

#### 6.b Radiology report

|                                                                                                                                   |                                                                                           |
|-----------------------------------------------------------------------------------------------------------------------------------|-------------------------------------------------------------------------------------------|
| Have you had radiological evidence of pneumonia (e.g. by chest X-ray or computed tomography scan) since the patient was admitted? | <input type="checkbox"/> Yes <input type="checkbox"/> No <input type="checkbox"/> Unknown |
|-----------------------------------------------------------------------------------------------------------------------------------|-------------------------------------------------------------------------------------------|

#### 7. Health worker pre-existing condition(s)

|                                                                  |                                                                                                                                                                                                                                                                                                                                                                                                                                                                                                                                                                                                                                                                                                                                                                                                                                                                                                                                                                                          |
|------------------------------------------------------------------|------------------------------------------------------------------------------------------------------------------------------------------------------------------------------------------------------------------------------------------------------------------------------------------------------------------------------------------------------------------------------------------------------------------------------------------------------------------------------------------------------------------------------------------------------------------------------------------------------------------------------------------------------------------------------------------------------------------------------------------------------------------------------------------------------------------------------------------------------------------------------------------------------------------------------------------------------------------------------------------|
| Do you have any underlying disease or pre-existing condition(s)? | <input type="checkbox"/> Pregnancy<br>If yes, specify trimester:<br><input type="checkbox"/> First <input type="checkbox"/> Second <input type="checkbox"/> Third <input type="checkbox"/> Unknown<br><input type="checkbox"/> Obesity<br>If yes, BMI: _____<br><input type="checkbox"/> Cancer<br><input type="checkbox"/> Diabetes<br><input type="checkbox"/> HIV/other immune deficiency<br><input type="checkbox"/> Heart disease<br><input type="checkbox"/> Asthma (requiring medication)<br><input type="checkbox"/> Chronic lung disease (non-asthma)<br><input type="checkbox"/> Chronic liver disease<br><input type="checkbox"/> Chronic haematological disorder<br><input type="checkbox"/> Chronic kidney disease<br><input type="checkbox"/> Chronic neurological impairment/disease<br><input type="checkbox"/> Organ/bone marrow recipient<br><input type="checkbox"/> No<br><input type="checkbox"/> Unknown<br><input type="checkbox"/> Others, please specify: _____ |
|------------------------------------------------------------------|------------------------------------------------------------------------------------------------------------------------------------------------------------------------------------------------------------------------------------------------------------------------------------------------------------------------------------------------------------------------------------------------------------------------------------------------------------------------------------------------------------------------------------------------------------------------------------------------------------------------------------------------------------------------------------------------------------------------------------------------------------------------------------------------------------------------------------------------------------------------------------------------------------------------------------------------------------------------------------------|

#### 8. Treatment/medications(s)

|                                                                             |                                                                                                                                                                                                                                                                                                                                       |
|-----------------------------------------------------------------------------|---------------------------------------------------------------------------------------------------------------------------------------------------------------------------------------------------------------------------------------------------------------------------------------------------------------------------------------|
| Are you taking any medication(s) regularly (apart from those for COVID-19)? | <input type="checkbox"/> Statin medication<br><input type="checkbox"/> Steroid medication<br><input type="checkbox"/> Antidiabetic medication<br><input type="checkbox"/> Immunosuppressive medication<br><input type="checkbox"/> No<br><input type="checkbox"/> Unknown<br><input type="checkbox"/> Other(s), please specify: _____ |
|-----------------------------------------------------------------------------|---------------------------------------------------------------------------------------------------------------------------------------------------------------------------------------------------------------------------------------------------------------------------------------------------------------------------------------|

|                                                                                   |                                                                                                                                                                                                                                                                      |
|-----------------------------------------------------------------------------------|----------------------------------------------------------------------------------------------------------------------------------------------------------------------------------------------------------------------------------------------------------------------|
| <p>Did you receive a prophylactic treatment for COVID-19 in the last 14 days?</p> | <p><input type="checkbox"/> Yes <input type="checkbox"/> No <input type="checkbox"/> Unknown</p> <p>If yes, which drug was received:</p> <p>_____</p> <p>Date started (dd/mm/yyyy)    __/__/__</p> <p>Date stopped (dd/mm/yyyy)    __/__/__</p> <p>Dosage: _____</p> |
|-----------------------------------------------------------------------------------|----------------------------------------------------------------------------------------------------------------------------------------------------------------------------------------------------------------------------------------------------------------------|
